# Supplementary material
Source: HighWire-hosted journal article supplement (https://mentalhealth.bmj.com/content/ebmental-2021-300404)
Supplement: inline-supplementary-material-1 [file inline-supplementary-material-1.pdf]

**Table of contents**

|           |                                                                                                                                                                                  |         |
|-----------|----------------------------------------------------------------------------------------------------------------------------------------------------------------------------------|---------|
| Figure S1 | Flow chart for the selection of study populations                                                                                                                                | p.2     |
| Table S1  | The list of code for the medications and diagnosis used for developing the prediction models for treatment continuations of antipsychotic treatment                              | p 3-4   |
| Table S2  | Definition of predictors included for the development of prediction models                                                                                                       | p 5     |
| Method S1 | Machine Learning Model Development                                                                                                                                               | p 6     |
| Figure S2 | Classification matrix and equation of prediction metrics.                                                                                                                        | p 7     |
| Figure S3 | Scheme of assignment of optimal medication for individual patient using the prediction models                                                                                    | p 8     |
| Table S3  | Baseline characteristics of patients with risperidone                                                                                                                            | p 9-10  |
| Table S4  | Baseline characteristics of patients with aripiprazole                                                                                                                           | p 11-12 |
| Figure S4 | Receiver operating curves and precision-recall curves for prediction models treatment continuation of risperidone and aripiprazole                                               | p 13    |
| Table S5. | The AUROC with confidence intervals in the test dataset                                                                                                                          | p 14    |
| Figure S5 | Prediction performance of specificity, sensitivity, precision, accuracy, f1-score, and MCC in predicting the treatment continuation for one year of risperidone and aripiprazole | p 15-16 |
| Figure S6 | Treatment continuation for overall populations and each cohort in the test dataset                                                                                               | p 17-18 |
| Table S6. | Relative predictor importance of the different prediction models for treatment continuation of risperidone                                                                       | p 19-20 |
| Table S7  | Relative predictor importance of the different prediction models for treatment continuation of aripiprazole                                                                      | p 21-22 |
| Table S8  | Performance of machine-learning models in predicting treatment continuation in the test dataset (using age and utilization of health care system as categorical predictors)      | p 23    |

**Figure S1. Flow chart for the selection of study populations**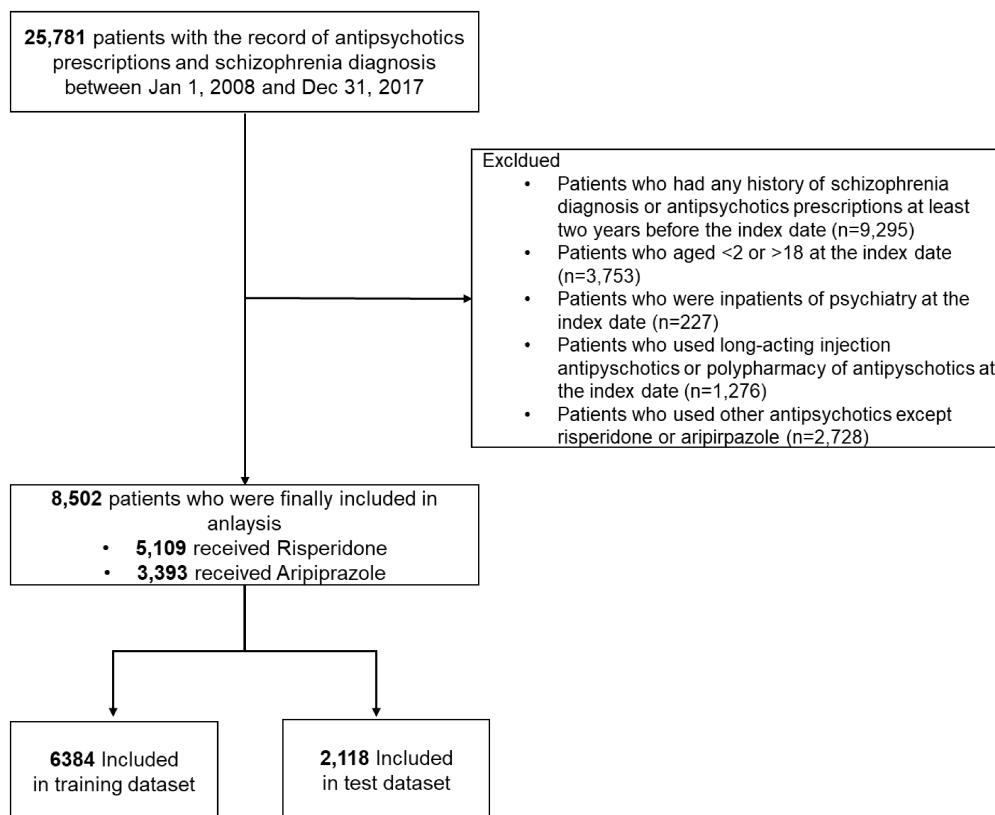

**Table S1. The list of code for the medications and diagnosis used for developing the prediction models for treatment continuations of antipsychotic treatment**

| <i>Comorbidities of other mental health disorders</i>                                              |                                                                                                                                                                                                                                                                                                                                                                                                                        |                                                                                                                                                                                                                                                       |
|----------------------------------------------------------------------------------------------------|------------------------------------------------------------------------------------------------------------------------------------------------------------------------------------------------------------------------------------------------------------------------------------------------------------------------------------------------------------------------------------------------------------------------|-------------------------------------------------------------------------------------------------------------------------------------------------------------------------------------------------------------------------------------------------------|
| <b>Classification</b>                                                                              | <b>ICD-10 code</b>                                                                                                                                                                                                                                                                                                                                                                                                     |                                                                                                                                                                                                                                                       |
| Anxiety disorder                                                                                   | F40, F41                                                                                                                                                                                                                                                                                                                                                                                                               |                                                                                                                                                                                                                                                       |
| Depression                                                                                         | F32, F33                                                                                                                                                                                                                                                                                                                                                                                                               |                                                                                                                                                                                                                                                       |
| ADHD                                                                                               | F90                                                                                                                                                                                                                                                                                                                                                                                                                    |                                                                                                                                                                                                                                                       |
| Somatoform disorder                                                                                | F45                                                                                                                                                                                                                                                                                                                                                                                                                    |                                                                                                                                                                                                                                                       |
| Reaction to severe stress and adjustment disorder                                                  | F43                                                                                                                                                                                                                                                                                                                                                                                                                    |                                                                                                                                                                                                                                                       |
| Other neurotic disorders                                                                           | F48                                                                                                                                                                                                                                                                                                                                                                                                                    |                                                                                                                                                                                                                                                       |
| Mental retardation                                                                                 | F70-F79                                                                                                                                                                                                                                                                                                                                                                                                                |                                                                                                                                                                                                                                                       |
| Other behavior and emotional disorders with onset generally occurring in childhood and adolescence | F98                                                                                                                                                                                                                                                                                                                                                                                                                    |                                                                                                                                                                                                                                                       |
| Emotional disorders with onset specific to childhood                                               | F93                                                                                                                                                                                                                                                                                                                                                                                                                    |                                                                                                                                                                                                                                                       |
| Nonorganic disorder                                                                                | F51                                                                                                                                                                                                                                                                                                                                                                                                                    |                                                                                                                                                                                                                                                       |
| Tic disorder                                                                                       | F95                                                                                                                                                                                                                                                                                                                                                                                                                    |                                                                                                                                                                                                                                                       |
| Bipolar disorder                                                                                   | F31                                                                                                                                                                                                                                                                                                                                                                                                                    |                                                                                                                                                                                                                                                       |
| Autism spectrum disorder                                                                           | F84                                                                                                                                                                                                                                                                                                                                                                                                                    |                                                                                                                                                                                                                                                       |
| Other mental health disorders                                                                      | Other diagnosis with F code                                                                                                                                                                                                                                                                                                                                                                                            |                                                                                                                                                                                                                                                       |
| <i>Prescription of other psychotropic medications</i>                                              |                                                                                                                                                                                                                                                                                                                                                                                                                        |                                                                                                                                                                                                                                                       |
| <b>Classification</b>                                                                              | <b>ATC code</b>                                                                                                                                                                                                                                                                                                                                                                                                        | <b>Agents in that classification</b>                                                                                                                                                                                                                  |
| Antiepileptic drugs                                                                                | N03A                                                                                                                                                                                                                                                                                                                                                                                                                   | Phenobarbital, Primidone, Phenytoin, Fosphenytoin, Ethosuximide, Clonazepam, Carbamazepine, Oxcarbazepine, Rufinamide, Valproic acid, Vigabatrin, Lamotrigine, Topiramate, Gabapentin, Levetiracetam, Zonisamide, Pregabalin, Stiripentol, Lacosamide |
| Anticholinergic drugs                                                                              | N04A                                                                                                                                                                                                                                                                                                                                                                                                                   | Trihexyphenidyl, Biperiden, Procyclidine, Benztropine                                                                                                                                                                                                 |
| Antianxiety drugs                                                                                  | N05B                                                                                                                                                                                                                                                                                                                                                                                                                   | Diazepam, Chlordiazepoxide, Lorazepam, Bromazepam, Clobazam, Alprazolam, Ethyl loflazepate, Etizolam, Clotiazepam, Tofisopam, Hydroxyzine, Buspirione                                                                                                 |
| Antidepressants drugs                                                                              | N06A                                                                                                                                                                                                                                                                                                                                                                                                                   | Fluoxetine, Citalopram, Paroxetine, Sertraline, Fluvoxamine, Escitalopram, Venlafaxine, Milnacipran, Duloxetine, Desvenlafaxine, Clomipramine, Amitriptyline, Doxepin, Amoxapine, Moclobemide, Trazodone, Mirtazapine, Bupropion, Tianeptine          |
| Stimulants for ADHD                                                                                | N06B                                                                                                                                                                                                                                                                                                                                                                                                                   | Methylphenidate                                                                                                                                                                                                                                       |
| Nonstimulants for ADHD                                                                             | N06B                                                                                                                                                                                                                                                                                                                                                                                                                   | Modafinil, Atomoxetine, Clonidine                                                                                                                                                                                                                     |
| <i>Comorbidities of general clinical conditions</i>                                                |                                                                                                                                                                                                                                                                                                                                                                                                                        |                                                                                                                                                                                                                                                       |
| <b>Classification</b>                                                                              | <b>ICD-10 code</b>                                                                                                                                                                                                                                                                                                                                                                                                     |                                                                                                                                                                                                                                                       |
| Neurologic and neuromuscular                                                                       | Q00, Q01, Q02, Q03, Q04, Q05, Q06, Q07, G901, E750, E751, E752, E754, G111, G112, G113, G114, G118, G119, G120, G121, G122, G128, G129, G310, G318, G328, G938, G939, G94, G911, G319, G253, G951, G958, G909, G851, G80, G371, G372, G378, G81, G82, G83, G931, G935, R402, I63, I635, G71, G72, G10, G20, G210, G211, G218, G230, G231, G232, G238, G240, G248, G253, G254, G255, G258, G259, G803, T850, T851, Z982 |                                                                                                                                                                                                                                                       |
| Cardiovascular                                                                                     | Q20, Q21, Q22, Q23, Q24, Q25, Q26, Q282, Q283, Q289, I340, I348, I360, I368, I370, I378, I42, I43, I515, I44, I45, I47, I48, I490, I491, I492, I493, I494, I495, I498, I499, R001, I270, I271, I272, 278, I279, I509, I517, I518, I631, I632, Z951, T825, T821, T820, T822, T826, T827, Z450, Z950, Z952, Z953, Z958, Z959, T862, Z941                                                                                 |                                                                                                                                                                                                                                                       |

|                                                                |                                                                                                                                                                                                                                                                                                                                                                                                                                                                                                                                                                                                                                     |
|----------------------------------------------------------------|-------------------------------------------------------------------------------------------------------------------------------------------------------------------------------------------------------------------------------------------------------------------------------------------------------------------------------------------------------------------------------------------------------------------------------------------------------------------------------------------------------------------------------------------------------------------------------------------------------------------------------------|
| Respiratory                                                    | Q30, Q31, Q32, Q33, Q34, P280, G473, I278, I43, J841, J961, Z902, E84, J950, J958, Z430, Z930, Z990, Z991, Z942                                                                                                                                                                                                                                                                                                                                                                                                                                                                                                                     |
| Renal and urologic                                             | Q60, Q61, Q62, Q63, Q64, N18, Z905, Z906, G834, N312, N319, Z935, Z936, Z992, Z435, Z436, Z466, T861, Z940                                                                                                                                                                                                                                                                                                                                                                                                                                                                                                                          |
| Gastrointestinal                                               | Q390, Q391, Q392, Q393, Q394, Q41, Q42, Q43, Q44, Q45, K73, K74, K754, K760, K761, K762, K763, K765, K768, K50, K51, I820, K551, K562, K593, Z980, Z903, Z904, Z931, Z932, Z933, Z934, Z431, Z432, Z433, Z434, Z465, T864, Z944                                                                                                                                                                                                                                                                                                                                                                                                     |
| <b>Classification</b>                                          | <b>ICD-10 code</b>                                                                                                                                                                                                                                                                                                                                                                                                                                                                                                                                                                                                                  |
| Hematologic or immunologic                                     | D55, D56, D57, D58, D60, D61, D71, D80, D81, D82, D83, D84, D85, D86, D87, D88, D89, D720, M303, M359, D66, D682, D694, D70, D761, D762, D763, D86, B20, B21, B22, B23, B24, M300, M310, M311, M313, M314, M316, M321, M339, M340, M341, M349                                                                                                                                                                                                                                                                                                                                                                                       |
| Metabolic                                                      | E700, E702, E703, E708, E709, E710, E711, E712, E713, E714, E715, E720, E721, E722, E723, E724, E728, E729, E740, E741, E742, E743, E744, E748, E749, E75, E770, E771, E780, E781, E782, E783, E784, E785, E786, E787, E788, E789, E881, E888, E760, E761, E762, E763, E85, E791, E798, E804, E805, E806, E807, E830, E831, E833, E834, D841, E88, H498, E009, E230, E232, E222, E233, E237, E240, E242, E243, E248, E249, E268, E250, E258, E259, Z4681, Z9641                                                                                                                                                                     |
| Other congenital or genetic defects                            | Q90, Q91, Q92, Q93, Q94, Q95, Q96, Q97, Q98, Q99, E343, M410, M412, M4130, M418, M419, M4330, M965, Q722, Q750, Q752, Q759, Q760, Q761, Q762, Q764, Q765, Q766, Q767, Q77, Q78, K449, Q790, Q791, Q792, Q793, Q794, Q795, Q799, Q81, Q871, Q872, Q873, Q874, Q878, Q897, Q899, Q992                                                                                                                                                                                                                                                                                                                                                 |
| Malignancy                                                     | C00, C01, C02, C03, C04, C05, C06, C07, C08, C09, C10, C11, C12, C13, C14, C15, C16, C17, C18, C19, C20, C21, C22, C23, C24, C25, C26, C27, C28, C29, C30, C31, C32, C33, C34, C35, C36, C37, C38, C39, C40, C41, C42, C43, C44, C45, C46, C47, C48, C49, C50, C51, C52, C53, C54, C55, C56, C57, C58, C59, C60, C61, C62, C63, C64, C65, C66, C67, C68, C69, C70, C71, C72, C73, C74, C75, C76, C77, C78, C79, C80, C81, C82, C83, C84, C85, C86, C87, C88, C89, C90, C91, C92, C93, C94, C95, C96, D00, D01, D02, D03, D04, D05, D06, D07, D08, D09, D37, D38, D39, D40, D41, D42, D43, D44, D45, D46, D47, D48, Q850, T860, Z948 |
| Premature and neonatal                                         | P050, P051, P052, P059, P070, P072, P100, P101, P104, P524, P528, P115, P210, P219, P250, P251, P252, P253, P258, P270, P271, P278, P916, P950, P350, P351, P252, P560, P570, P578, P613, P614, P77, P832, P912,                                                                                                                                                                                                                                                                                                                                                                                                                    |
| Miscellaneous, not elsewhere classified                        | T840, T841, T844, T845, T846, T847, T868, T869, T870, T871, T872, Y831, Y833, Z998, T868, T869                                                                                                                                                                                                                                                                                                                                                                                                                                                                                                                                      |
| Asthma                                                         | J45, J46                                                                                                                                                                                                                                                                                                                                                                                                                                                                                                                                                                                                                            |
| Diabetes mellitus                                              | E10, E11, E12, E13, E14                                                                                                                                                                                                                                                                                                                                                                                                                                                                                                                                                                                                             |
| Seizure                                                        | R56, G40                                                                                                                                                                                                                                                                                                                                                                                                                                                                                                                                                                                                                            |
| <b>Prescriptions of other general medications <sup>a</sup></b> |                                                                                                                                                                                                                                                                                                                                                                                                                                                                                                                                                                                                                                     |
| <b>Classification</b>                                          | <b>Drug class (no.)</b>                                                                                                                                                                                                                                                                                                                                                                                                                                                                                                                                                                                                             |
| Antipyretics, analgesics                                       | 114                                                                                                                                                                                                                                                                                                                                                                                                                                                                                                                                                                                                                                 |
| Antihistamines                                                 | 141                                                                                                                                                                                                                                                                                                                                                                                                                                                                                                                                                                                                                                 |
| Other antiallergic agents                                      | 142                                                                                                                                                                                                                                                                                                                                                                                                                                                                                                                                                                                                                                 |
| Cardiovascular system drugs                                    | 210                                                                                                                                                                                                                                                                                                                                                                                                                                                                                                                                                                                                                                 |
| Respiratory system drug                                        | 220                                                                                                                                                                                                                                                                                                                                                                                                                                                                                                                                                                                                                                 |
| Drugs for diabetes Mellitus                                    | 396                                                                                                                                                                                                                                                                                                                                                                                                                                                                                                                                                                                                                                 |
| Antibiotic preparations                                        | 610                                                                                                                                                                                                                                                                                                                                                                                                                                                                                                                                                                                                                                 |
| Narcotic analgesics                                            | 811,821                                                                                                                                                                                                                                                                                                                                                                                                                                                                                                                                                                                                                             |

**Table S2. Definition of predictors included for the development of prediction models <sup>a</sup>**

| Classification                                                                   | Definition                                                                                                  |
|----------------------------------------------------------------------------------|-------------------------------------------------------------------------------------------------------------|
| Sex                                                                              | Sex recorded in the data source                                                                             |
| Age                                                                              | Age measured at the index date                                                                              |
| Insurance type                                                                   | Health insurance type recorded in the data source at the index date (Health insurance and medical aid)      |
| 1st diagnosis of schizophrenia at the index date                                 | The first diagnosis date of schizophrenia was the index date (yes or no)                                    |
| Comorbidities of mental health disorders <sup>a</sup>                            | At least one diagnosis record of each mental health disorder for one year before the index date (yes or no) |
| Prescriptions of other psychotropic medications                                  | At least one prescription record of each other psychotropic medication (yes or no)                          |
| Comorbidities of other chronic conditions                                        | At least one diagnosis record of each chronic condition (yes or no)                                         |
| Prescriptions of other general medications                                       | At least one prescription record of each general medication (yes or no)                                     |
| Utilization of health care system for mental health disorders, any route         | Number of any route visits for mental health disorders                                                      |
| Utilization of health care system for mental health disorders, inpatient         | Number of inpatient visits for mental health disorders                                                      |
| Utilization of health care system for mental health disorders, outpatient        | Number of outpatient visits for mental health disorders                                                     |
| Utilization of health care system for mental health disorders, emergency room    | Number of emergency room visits for mental health disorders                                                 |
| Utilization of health care system for nonmental health disorders, any route      | Number of any route visits for non-mental health disorders                                                  |
| Utilization of health care system for nonmental health disorders, inpatient      | Number of inpatient visits for non-mental health disorders                                                  |
| Utilization of health care system for nonmental health disorders, outpatient     | Number of outpatient visits for non-mental health disorders                                                 |
| Utilization of health care system for nonmental health disorders, emergency room | Number of emergency room visits for non-mental health disorders                                             |

a. All potential predictors were measured for one year before the index date.

b. The definition of mental health disorders was considered as F00-F99 according to ICD-10 codes.

## Method S1. Machine Learning Model Development

The LASSO, ridge, and elastic net are the penalized regression algorithms. Their penalized regression was tuned by performing 5-fold cross-validation (CV) with the grid search between 0.0001 and 100000 (for elastic net, the penalized value was set to 0.5 by grid search, which equally balanced the model between LASSO and ridge penalties equally<sup>1</sup>).

Random forest and GBM are the tree-based ensemble methods, which are constructed by combining single decision tree models to strengthen the performance of the prediction models. Random forest was fitted using the number of trees as 500, which was best according to the 5-fold CV. In this process, we used the number of variables randomly sampled as candidates at each split as the default value (the root square of the number of predictors) because this value was insensitive to the performance of models.<sup>2</sup> For GBM, an interaction depth of 4 and a learning rate as 0.01 were used, and the 5-fold CV was conducted to tune the number of trees to build. The GBMs showed a consistent performance when these parameters were used in various conditions.<sup>3</sup>

SuperLearner is an ensemble method generated from a set of single prediction models. We used the SuperLearner package<sup>45</sup> to build this ensemble model using these tuned machine-learning models (LASSO, ridge, elastic net, randomforest, and GBM) and backward stepwise LR. The 5-fold CV process was performed to identify the optimal weight for combining these models.

**Table. Corresponding hyperparameters for machine-learning algorithms**

| Algorithm            | R package                 | Hyperparameter           | Hyperparameter value                                                         | Best parameter setting <sup>a</sup>                    |
|----------------------|---------------------------|--------------------------|------------------------------------------------------------------------------|--------------------------------------------------------|
| <b>LASSO</b>         | glmnet <sup>6</sup>       | Lambda                   | Automatic grid search with 500 different values ranging from 0.001 to 100000 | Risperidone: 0.004542706/<br>Aripiprazole: 0.006332908 |
| <b>Ridge</b>         | glmnet <sup>6</sup>       | Lambda                   | Automatic grid search with 500 different values ranging from 0.001 to 100000 | Risperidone: 0.1630891/<br>Aripiprazole: 0.2539859     |
| <b>Elastic net</b>   | glmnet <sup>6</sup>       | alpha                    | 0.25, 0.5, 0.75                                                              | 0.5                                                    |
|                      |                           | Lambda                   | Automatic grid search with 500 different values ranging from 0.001 to 100000 | Risperidone: 0.007074559/<br>Aripiprazole: 0.012770633 |
| <b>Random forest</b> | randomforest <sup>2</sup> | Number of trees to build | 100, 200, 300, 500, 1000                                                     | 500                                                    |
|                      |                           | Max depth                | 2, 4, 5                                                                      | 4                                                      |
|                      |                           | Predictors               | 7                                                                            | 7                                                      |
| <b>GBM</b>           | gbm <sup>7</sup>          | Number of trees to build | 500, 1000, 1500, 3000, 5000, 7000, 10000                                     | 10000                                                  |
|                      |                           | Boosting learn rate      | 0.01                                                                         | 0.01                                                   |
|                      |                           | Maximum nodes per tree   | 4                                                                            | 4                                                      |

LASSO, least absolute shrinkage and selection operator; GBM, gradient boosting machine

a. The best parameter setting was determined to be the value that maximized the AUROC in the training dataset.

b. Other unmentioned hyperparameters were set to their default values.

**Figure S2. Classification matrix and equation of prediction metrics****Classification matrix**

|                           | <u>Predicted category</u> |                           |
|---------------------------|---------------------------|---------------------------|
| <u>Actual category</u>    | Treatment continuation    | Treatment discontinuation |
| Treatment continuation    | True positive (TP)        | False negative (FN)       |
| Treatment discontinuation | False positive (FP)       | True negative (TN)        |

$$\text{Sensitivity (recall)} = \frac{TP}{TP+FN}$$

$$\text{Specificity} = \frac{TN}{TN+FP}$$

$$\text{Precision} = \frac{TP}{TP+FP}$$

$$\text{Accuracy} = \frac{TP+TN}{TP+FN+FP+TN}$$

$$\text{F1 – score} = 2 \times \frac{PR \times RE}{PR+RE}$$

$$\text{MCC} = \frac{TP \times TN - FP \times FN}{\sqrt{(TP+FN)(TP+FP)(TN+FP)(TN+FN)}}$$

**Figure S3. Scheme of assignment of optimal medication for individual patients using the prediction models**

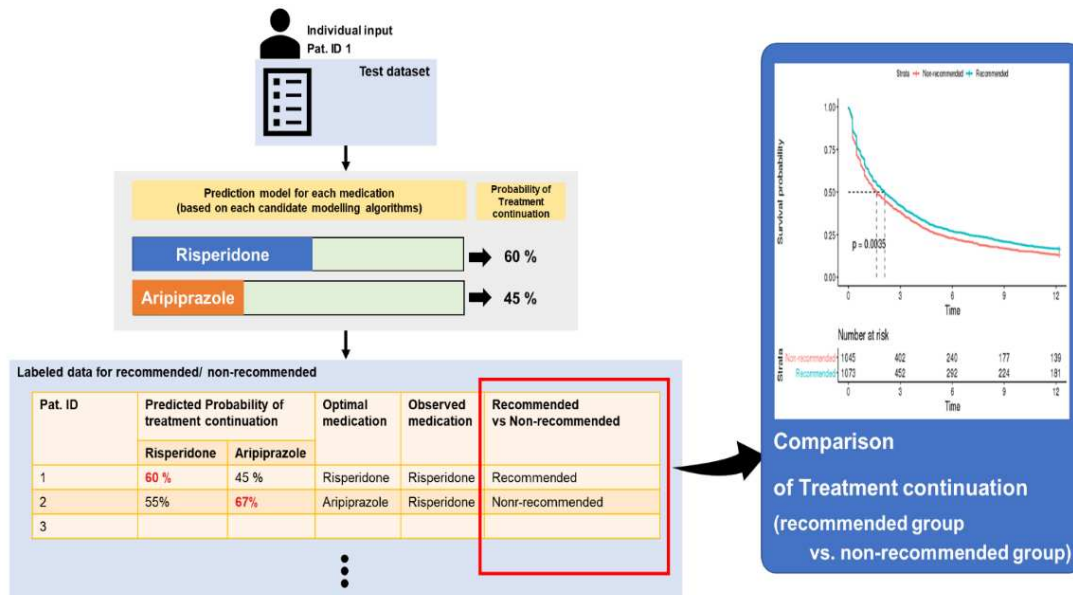

Proportion of patients with treatment continuation

$$= \frac{\text{Number of patients with treatment continuation}}{\text{Number of patients in the recommended(or nonrecommended) group}}$$



**Table S3. Baseline characteristics of patients with risperidone**

|                                                                                                    | <b>Train<br/>(n=3826)</b> | <b>Test<br/>(n=1283)</b> | <b>p-value</b> |
|----------------------------------------------------------------------------------------------------|---------------------------|--------------------------|----------------|
| <b>Treatment continuation for 1 year (n, %)</b>                                                    | 531 (13.9)                | 193 (15.0)               | 0.323          |
| <b>Demographics<sup>a</sup> (n, %)</b>                                                             |                           |                          |                |
| Sex                                                                                                |                           |                          |                |
| Male                                                                                               | 2395 (62.6)               | 800 (62.4)               | 0.902          |
| Female                                                                                             | 1431 (37.4)               | 483 (37.6)               |                |
| Age (years, Mean $\pm$ SD)                                                                         | 13.8 $\pm$ 3.5            | 13.8 $\pm$ 3.4           | 0.839          |
| Insurance type                                                                                     |                           |                          |                |
| Health insurance                                                                                   | 3249 (84.9)               | 1094 (85.3)              | 0.796          |
| Medical aid                                                                                        | 577 (15.1)                | 189 (14.7)               |                |
| <b>Comorbidities of mental health disorders<sup>b</sup> (n, %)</b>                                 |                           |                          |                |
| First diagnosis of schizophrenia at index date                                                     | 1445 (37.8)               | 524 (40.8)               | 0.054          |
| Anxiety disorder                                                                                   | 581 (15.2)                | 195 (15.2)               | 1.000          |
| Depression                                                                                         | 929 (24.3)                | 328 (25.6)               | 0.375          |
| ADHD                                                                                               | 892 (23.3)                | 269 (21.0)               | 0.089          |
| Somatoform disorder                                                                                | 78 (2.0)                  | 27 (2.1)                 | 0.976          |
| Reaction to severe stress, and adjustment disorder                                                 | 329 (8.6%)                | 109 (8.5)                | 0.955          |
| Other neurotic disorders                                                                           | 37 (1.0)                  | 19 (1.5)                 | 0.169          |
| Mental retardation                                                                                 | 408 (10.7)                | 124 (9.7)                | 0.337          |
| Other behavior and emotional disorders with onset generally occurring in childhood and adolescence | 94 (2.5)                  | 30 (2.3)                 | 0.893          |
| Emotional disorders with onset specific to childhood                                               | 229 (6.0)                 | 56 (4.4)                 | 0.034          |
| Nonorganic disorder                                                                                | 86 (2.2)                  | 41 (3.2)                 | 0.075          |
| Tic disorder                                                                                       | 145 (3.8)                 | 47 (3.7)                 | 0.903          |
| Bipolar disorder                                                                                   | 90 (2.4)                  | 30 (2.3)                 | 1.000          |
| Autism spectrum disorder                                                                           | 200 (5.2)                 | 77 (6.0)                 | 0.323          |
| Other mental health disorders                                                                      | 873 (22.8)                | 277 (21.6)               | 0.383          |
| <b>Prescriptions of other psychotropics<sup>b</sup> (n, %)</b>                                     |                           |                          |                |
| Anticholinergic drugs                                                                              | 21 (0.5)                  | 13 (1.0)                 | 0.116          |
| Antianxiety drugs                                                                                  | 1103 (28.8)               | 386 (30.1)               | 0.411          |
| SSRI/SNRI                                                                                          | 1035 (27.1)               | 334 (26.0)               | 0.499          |
| TCA                                                                                                | 75 (2.0)                  | 32 (2.5)                 | 0.297          |
| MAO inhibitor                                                                                      | 150 (3.9)                 | 46 (3.6)                 | 0.648          |
| Stimulants for ADHD                                                                                | 692 (18.1)                | 200 (15.6)               | 0.046          |
| Non-stimulants for ADHD                                                                            | 138 (3.6)                 | 40 (3.1)                 | 0.460          |
| Antiepileptic drugs                                                                                | 475 (12.4)                | 137 (10.7)               | 0.108          |
| Lithium                                                                                            | 45 (1.2)                  | 13 (1.0)                 | 0.746          |
| <b>Comorbidities of pediatric chronic conditions<sup>b,c</sup> (n, %)</b>                          |                           |                          |                |
| Neurologic and neuromuscular                                                                       | 94 (2.5)                  | 34 (2.7)                 | 0.780          |
| Cardiovascular                                                                                     | 52 (1.4)                  | 19 (1.5)                 | 0.853          |
| Respiratory                                                                                        | 1 (0.0)                   | 0 (0.0)                  | 1.000          |
| Renal and urologic                                                                                 | 51 (1.3)                  | 8 (0.6)                  | 0.056          |
| Gastrointestinal                                                                                   | 65 (1.7)                  | 16 (1.2)                 | 0.321          |
| Hematologic or immunologic                                                                         | 7 (0.2%)                  | 5 (0.4)                  | 0.322          |
| Metabolic                                                                                          | 167 (4.4)                 | 53 (4.1)                 | 0.781          |
| Other congenital or genetic defects                                                                | 92 (2.4)                  | 30 (2.3)                 | 0.977          |

|                                                                      |             |             |       |
|----------------------------------------------------------------------|-------------|-------------|-------|
| Malignancy                                                           | 23 (0.6)    | 3 (0.2)     | 0.170 |
| Neonatal                                                             | 2 (0.1)     | 1 (0.1)     | 1.000 |
| Asthma                                                               | 580 (15.2)  | 218 (17.0)  | 0.129 |
| Diabetes mellitus                                                    | 36 (0.9)    | 18 (1.4)    | 0.214 |
| Seizure                                                              | 305 (8.0)   | 92 (7.2)    | 0.386 |
| <b>Prescriptions of other general medications<sup>b</sup> (n, %)</b> |             |             |       |
| Antipyretics, analgesics                                             | 2195 (57.4) | 765 (59.6)  | 0.167 |
| Antihistamines                                                       | 2555 (66.8) | 868 (67.7)  | 0.588 |
| Other antiallergic agents                                            | 5 (0.1)     | 2 (0.2)     | 1.000 |
| Cardiovascular system drugs                                          | 273 (7.1)   | 90 (7.0)    | 0.934 |
| Respiratory system drug                                              | 2698 (70.5) | 931 (72.6)  | 0.173 |
| Drugs for diabetes mellitus                                          | 2 (0.1)     | 5 (0.4)     | 0.017 |
| Antibiotic preparations                                              | 2676 (69.9) | 924 (72.0)  | 0.169 |
| Narcotic analgesics                                                  | 48 (1.3)    | 19 (1.5)    | 0.635 |
| <b>Utilization of health care system<sup>b</sup> (Mean ± SD)</b>     |             |             |       |
| Number of any route visits for mental health disorders               | 1.7 ± 2.2   | 1.8 ± 4.9   | 0.372 |
| Number of inpatient visits for mental health disorders               | 0.0 ± 0.5   | 0.2 ± 4.4   | 0.295 |
| Number of outpatient visits for mental health disorders              | 1.6 ± 2.2   | 1.6 ± 2.2   | 0.972 |
| Number of emergency room visit for mental health disorders           | 0.0±0.1     | 0.0±0.1     | 0.466 |
| Number of any route visits for nonmental health disorders            | 12.0 ± 13.3 | 12.4 ± 13.7 | 0.296 |
| Number of inpatient visits for nonmental health disorders            | 0.2 ± 1.0   | 0.2 ± 1.0   | 0.232 |
| Number of outpatient visits for nonmental health disorders           | 11.8 ± 13.1 | 12.2 ± 13.5 | 0.307 |
| Number of emergency room visits for nonmental health disorders       | 0.0 ± 0.3   | 0.0 ± 0.3   | 0.402 |

ADHD, attention deficit hyperactivity disorder; SSRI, selective serotonin reuptake inhibitor; SNRI, selective norepinephrine reuptake inhibitor; MAO inhibitor, monoamine oxidase inhibitor

a. Assessed on the cohort entry

b. Assessed for one-year before the index date

c. The pediatric complex chronic conditions were classified according to the modified the criteria of Feudtner et al (2014).

**Table S4. Baseline characteristics of patients with aripiprazole**

|                                                                                                    | <b>Train<br/>dataset<br/>(n=2,558)</b> | <b>Test<br/>dataset<br/>(n=835)</b> | <b>p-value</b> |
|----------------------------------------------------------------------------------------------------|----------------------------------------|-------------------------------------|----------------|
| <b>Treatment continuation for 1 year (n, %)</b>                                                    | 350 (13.7)                             | 121 (14.5)                          | 0.597          |
| <b>Demographics<sup>a</sup> (n, %)</b>                                                             |                                        |                                     |                |
| Sex                                                                                                |                                        |                                     | 0.416          |
| Male                                                                                               | 1,455 (56.9)                           | 489 (58.6)                          |                |
| Female                                                                                             | 1,103 (43.1)                           | 346 (41.4)                          |                |
| Age (years, Mean $\pm$ SD)                                                                         | 14.0 $\pm$ 3.4                         | 14.2 $\pm$ 3.3                      | 0.195          |
| Insurance type                                                                                     |                                        |                                     | 0.572          |
| Health insurance                                                                                   | 2,395 (93.6)                           | 787 (94.3)                          |                |
| Medical aid                                                                                        | 163 (6.4)                              | 48 (5.7)                            |                |
| <b>Comorbidities of mental health disorders<sup>b</sup> (n, %)</b>                                 |                                        |                                     |                |
| First diagnosis of schizophrenia at index date                                                     | 1,227 (48.0)                           | 421 (50.4)                          | 0.234          |
| Anxiety disorder                                                                                   | 552 (21.6)                             | 189 (22.6)                          | 0.553          |
| Depression                                                                                         | 883 (34.5)                             | 301 (36.0)                          | 0.446          |
| ADHD                                                                                               | 513 (20.1)                             | 181 (21.7)                          | 0.337          |
| Somatoform disorder                                                                                | 76 (3.0)                               | 15 (1.8)                            | 0.089          |
| Reaction to severe stress, and adjustment disorder                                                 | 248 (9.7)                              | 77 (9.2)                            | 0.737          |
| Other neurotic disorders                                                                           | 35 (1.4)                               | 15 (1.8)                            | 0.468          |
| Mental retardation                                                                                 | 140 (5.5)                              | 44 (5.3)                            | 0.891          |
| Other behavior and emotional disorders with onset generally occurring in childhood and adolescence | 52 (2.0)                               | 14 (1.7)                            | 0.615          |
| Emotional disorders with onset specific to childhood                                               | 102 (4.0)                              | 33 (4.0)                            | 1.000          |
| Nonorganic disorder                                                                                | 95 (3.7)                               | 19 (2.3)                            | 0.058          |
| Tic disorder                                                                                       | 169 (6.6)                              | 51 (6.1)                            | 0.669          |
| Bipolar disorder                                                                                   | 84 (3.3)                               | 33 (4.0)                            | 0.418          |
| Autism spectrum disorder                                                                           | 117 (4.6)                              | 28 (3.4)                            | 0.157          |
| Other mental health disorders                                                                      | 615 (24.0)                             | 204 (24.4)                          | 0.856          |
| <b>Prescriptions of other psychotropics<sup>b</sup> (n, %)</b>                                     |                                        |                                     |                |
| Anticholinergic drugs                                                                              | 12 (0.5)                               | 6 (0.7)                             | 0.557          |
| Antianxiety drugs                                                                                  | 822 (32.1)                             | 275 (32.9)                          | 0.699          |
| SSRI/SNRI                                                                                          | 877 (34.3)                             | 292 (35.0)                          | 0.749          |
| TCA                                                                                                | 60 (2.3)                               | 16 (1.9)                            | 0.553          |
| MAO inhibitor                                                                                      | 139 (5.4)                              | 48 (5.7)                            | 0.796          |
| Stimulants for ADHD                                                                                | 327 (12.8)                             | 118 (14.1)                          | 0.346          |
| Non-stimulants for ADHD                                                                            | 125 (4.9)                              | 53 (6.3)                            | 0.120          |
| Antiepileptic drugs                                                                                | 256 (10.0)                             | 102 (12.2)                          | 0.082          |
| Lithium                                                                                            | 32 (1.3)                               | 9 (1.1)                             | 0.830          |
| <b>Comorbidities of pediatric chronic conditions<sup>b,c</sup> (n, %)</b>                          |                                        |                                     |                |
| Neurologic and neuromuscular                                                                       | 49 (1.9)                               | 8 (1.0)                             | 0.086          |
| Cardiovascular                                                                                     | 39 (1.5)                               | 11 (1.3)                            | 0.790          |
| Respiratory                                                                                        | 3 (0.1)                                | 2 (0.2)                             | 0.779          |
| Renal and urologic                                                                                 | 21 (0.8)                               | 10 (1.2)                            | 0.433          |
| Gastrointestinal                                                                                   | 53 (2.1)                               | 10 (1.2)                            | 0.140          |
| Hematologic or immunologic                                                                         | 10 (0.4)                               | 3 (0.4)                             | 1.000          |
| Metabolic                                                                                          | 125 (4.9)                              | 35 (4.2)                            | 0.466          |

|                                                                      |              |             |       |
|----------------------------------------------------------------------|--------------|-------------|-------|
| Other congenital or genetic defects                                  | 48 (1.9)     | 17 (2.0)    | 0.884 |
| Malignancy                                                           | 5 (0.2)      | 2 (0.2)     | 1.000 |
| Neonatal                                                             | 1 (0.0)      | 0 (0.0)     | 1.000 |
| Asthma                                                               | 422 (16.5)   | 128 (15.3)  | 0.459 |
| Diabetes mellitus                                                    | 21 (0.8)     | 9 (1.1)     | 0.634 |
| Seizure                                                              | 177 (6.9)    | 65 (7.8)    | 0.444 |
| <b>Prescriptions of other general medications<sup>b</sup> (n, %)</b> |              |             |       |
| Antipyretics, analgesics                                             | 1,579 (61.7) | 534 (64.0)  | 0.267 |
| Antihistamines                                                       | 1,766 (69.0) | 575 (68.9)  | 0.958 |
| Other antiallergic agents                                            | 9 (0.4)      | 2 (0.2)     | 0.885 |
| Cardiovascular system drugs                                          | 248 (9.7)    | 63 (7.5)    | 0.072 |
| Respiratory system drug                                              | 1,829 (71.5) | 591 (70.8)  | 0.721 |
| Drugs for diabetes mellitus                                          | 5 (0.2)      | 2 (0.2)     | 1.000 |
| Antibiotic preparations                                              | 1,846 (72.2) | 614 (73.5)  | 0.469 |
| Narcotic analgesics                                                  | 41 (1.6)     | 11 (1.3)    | 0.674 |
| <b>Utilization of health care system<sup>b</sup> (Mean ± SD)</b>     |              |             |       |
| Number of any route visits for mental health disorders               | 1.9 ± 2.9    | 2.0 ± 5.4   | 0.606 |
| Number of inpatient visits for mental health disorders               | 0.1 ± 1.9    | 0.3 ± 4.8   | 0.366 |
| Number of outpatient visits for mental health disorders              | 1.8 ± 2.2    | 1.8 ± 2.2   | 0.523 |
| Number of emergency room visits for mental health disorders          | 0.0 ± 0.1    | 0.0 ± 0.1   | 0.137 |
| Number of any route visits for nonmental health disorders            | 12.5 ± 13.0  | 12.1 ± 11.7 | 0.380 |
| Number of inpatient visits for nonmental health disorders            | 0.2 ± 0.5    | 0.2 ± 0.8   | 0.205 |
| Number of outpatient visits for nonmental health disorders           | 12.4 ± 12.8  | 11.9 ± 11.5 | 0.334 |
| Number of emergency room visits for nonmental health disorders       | 0.0 ± 0.2    | 0.1 ± 0.3   | 0.092 |

ADHD, attention deficit hyperactivity disorder; SSRI, selective serotonin reuptake inhibitor; SNRI, selective norepinephrine reuptake inhibitor; MAO inhibitor, monoamine oxidase inhibitor

a. Assessed on the cohort entry

b. Assessed for one-year before the index date

c. The pediatric complex chronic conditions were classified according to the modified the criteria of Feudtner et al (2014).

**Figure S4. Receiver operating curves and precision-recall curves for prediction models treatment continuation of risperidone and aripiprazole**

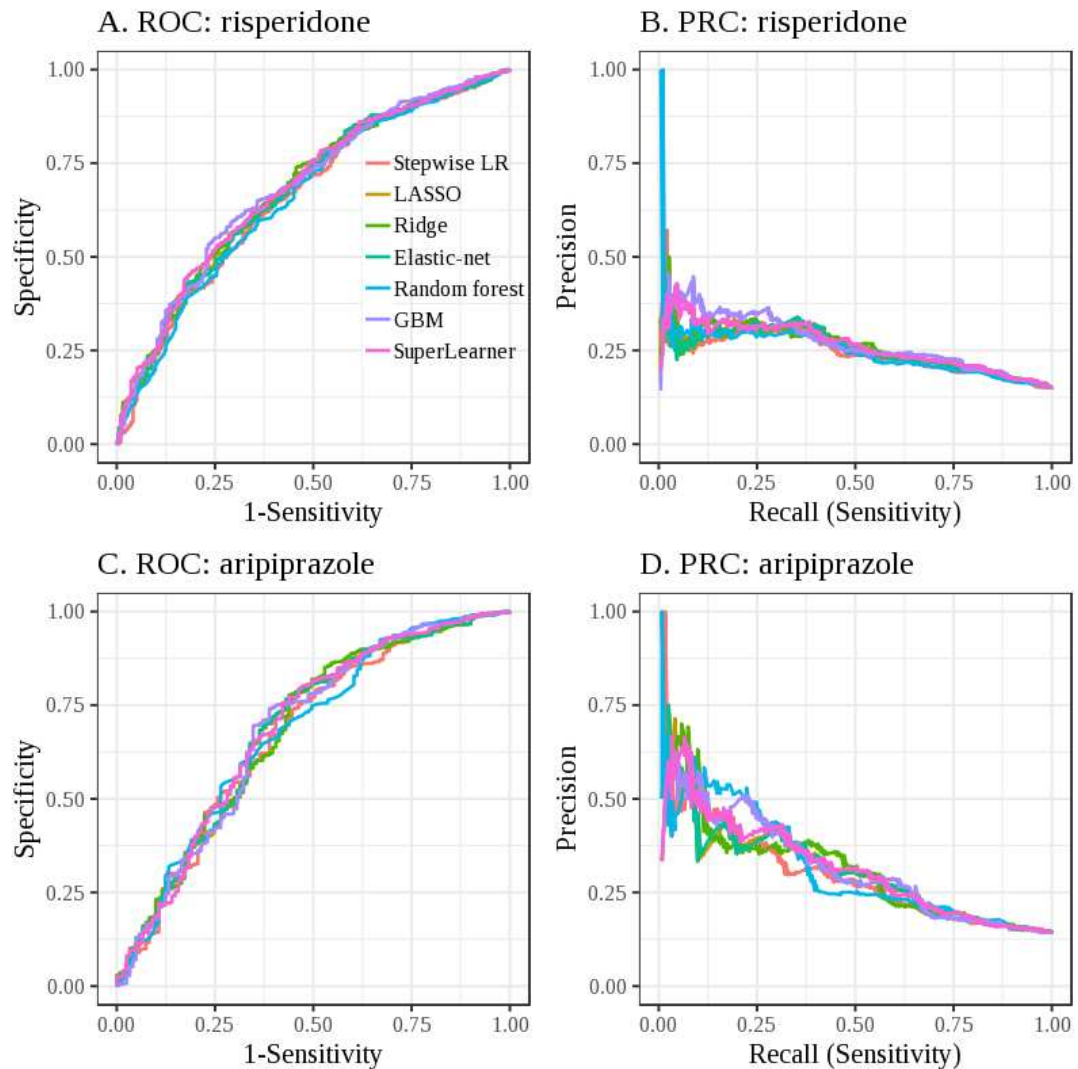

ROC, receiver operating curves; PRC, precision-recall curves; LR, logistic regression; LASSO, least absolute shrinkage and selection operator; GBM, gradient boosting machine

**Table S5. AUROC with confidence intervals in the test dataset**

|                      | AUROC (95% CI)      |                     |
|----------------------|---------------------|---------------------|
|                      | Risperidone         | Aripiprazole        |
| Backward stepwise LR | 0.659 (0.617–0.701) | 0.672 (0.616–0.728) |
| LASSO                | 0.678 (0.638–0.719) | 0.681 (0.625–0.738) |
| Ridge                | 0.680 (0.639–0.720) | 0.683 (0.627–0.738) |
| e-net                | 0.676 (0.635–0.716) | 0.683 (0.627–0.739) |
| Random forest        | 0.658 (0.616–0.700) | 0.678 (0.623–0.733) |
| GBM                  | 0.686 (0.646–0.726) | 0.682 (0.626–0.739) |
| SuperLearner         | 0.685 (0.645–0.725) | 0.688 (0.632–0.744) |

AUROC, area under the receiver operating characteristic curve; CI, confidence intervals; LR, logistic regression; LASSO, least absolute shrinkage and selection operator; e-net, elastic net; GBM, gradient boosting machine

**Figure S5. Prediction performance of specificity, sensitivity, precision, accuracy, F1 score, and MCC in predicting the treatment continuation of risperidone and aripiprazole**

(a) Risperidone

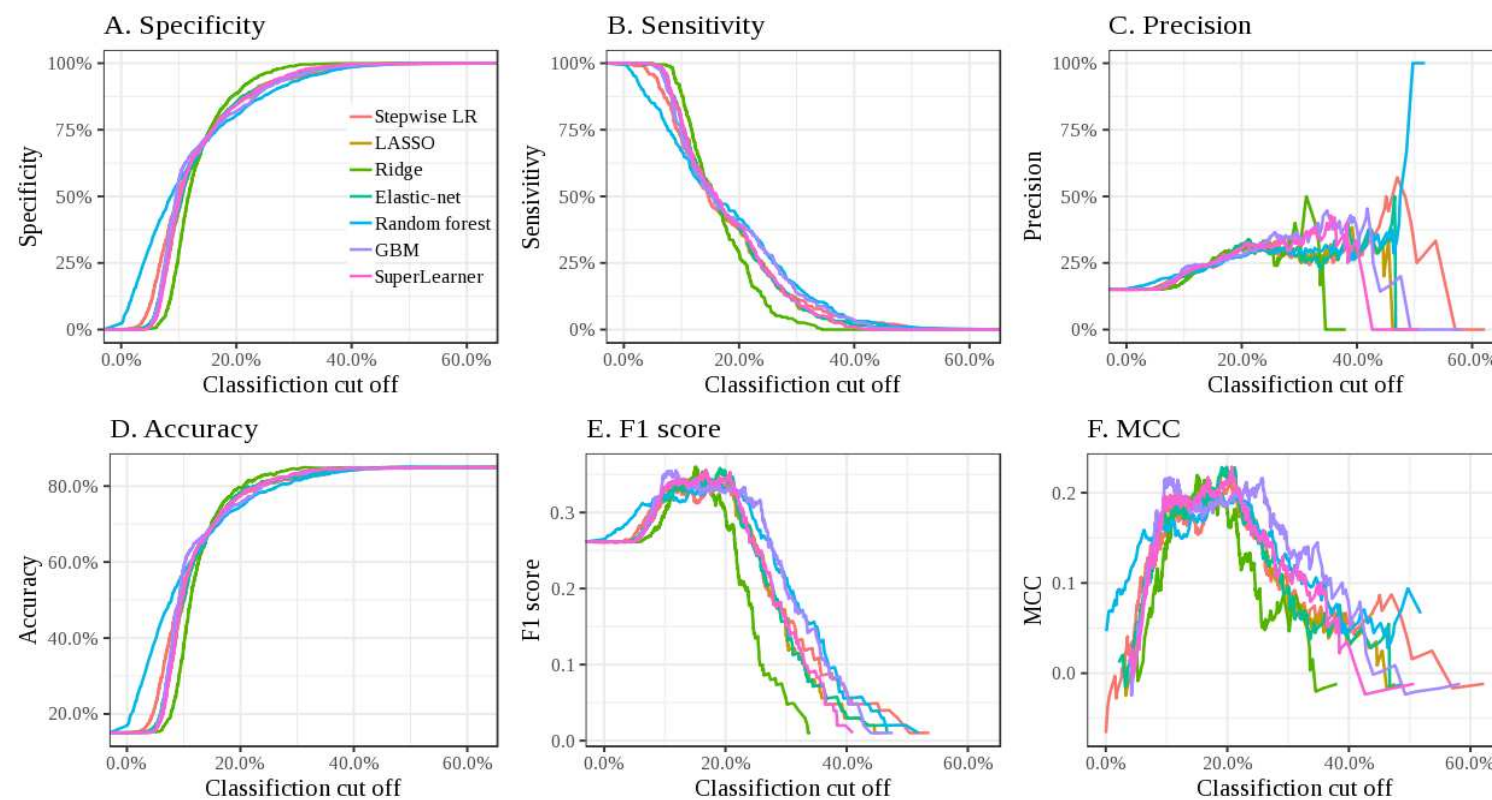

LR, logistic regression; LASSO, least absolute shrinkage and selection operator; GBM, gradient boosting machine; MCC, matthews correlation coefficients

**Figure S5. (Continued)**

(b) Aripiprazole

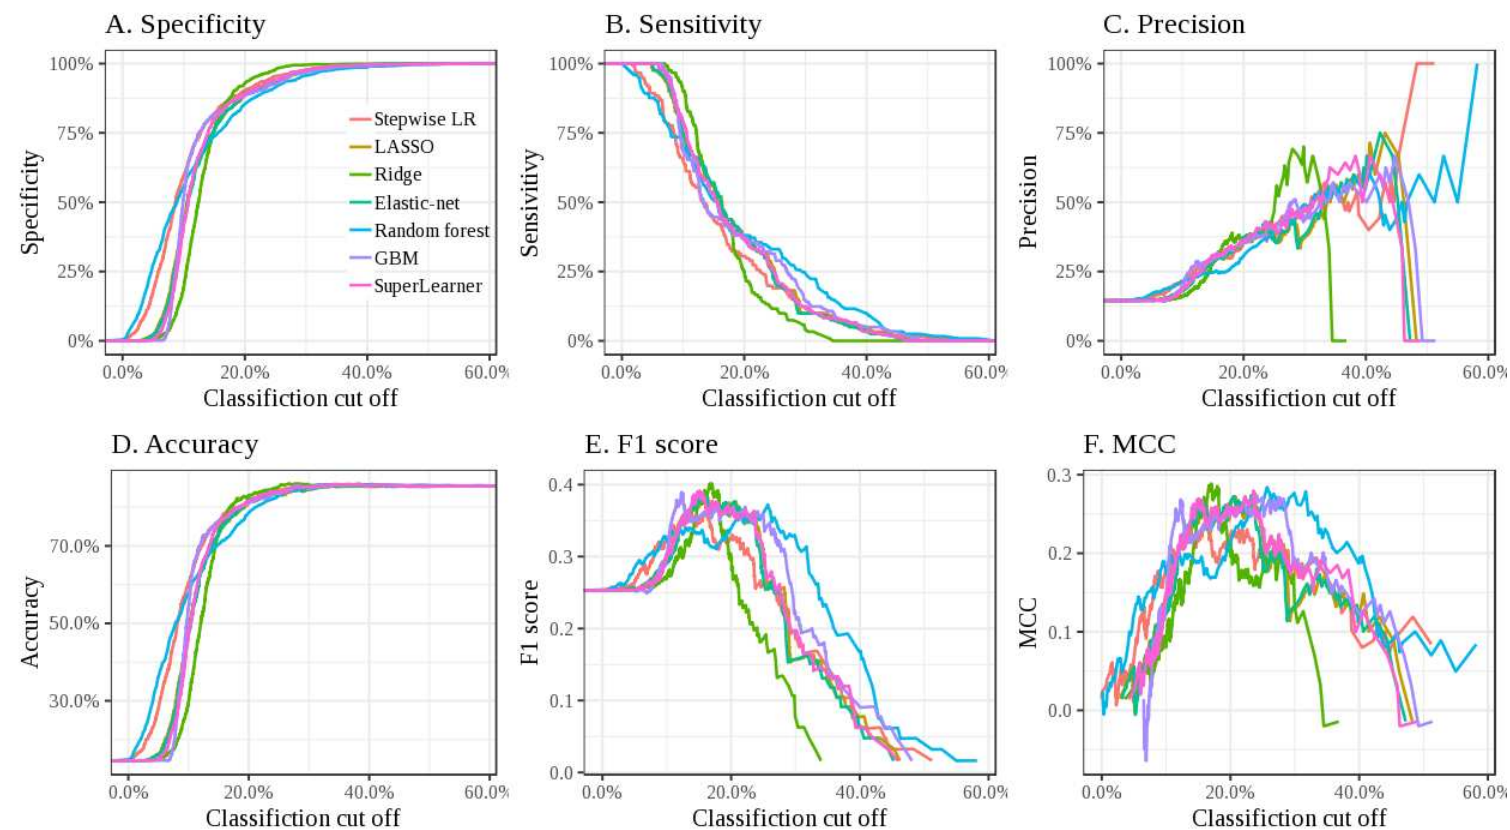

LR, logistic regression; LASSO, least absolute shrinkage and selection operator; GBM, gradient boosting machine; MCC, matthews correlation coefficients



**Figure S6. Treatment continuation for overall populations and each cohort in the test dataset**

(a) Risperidone

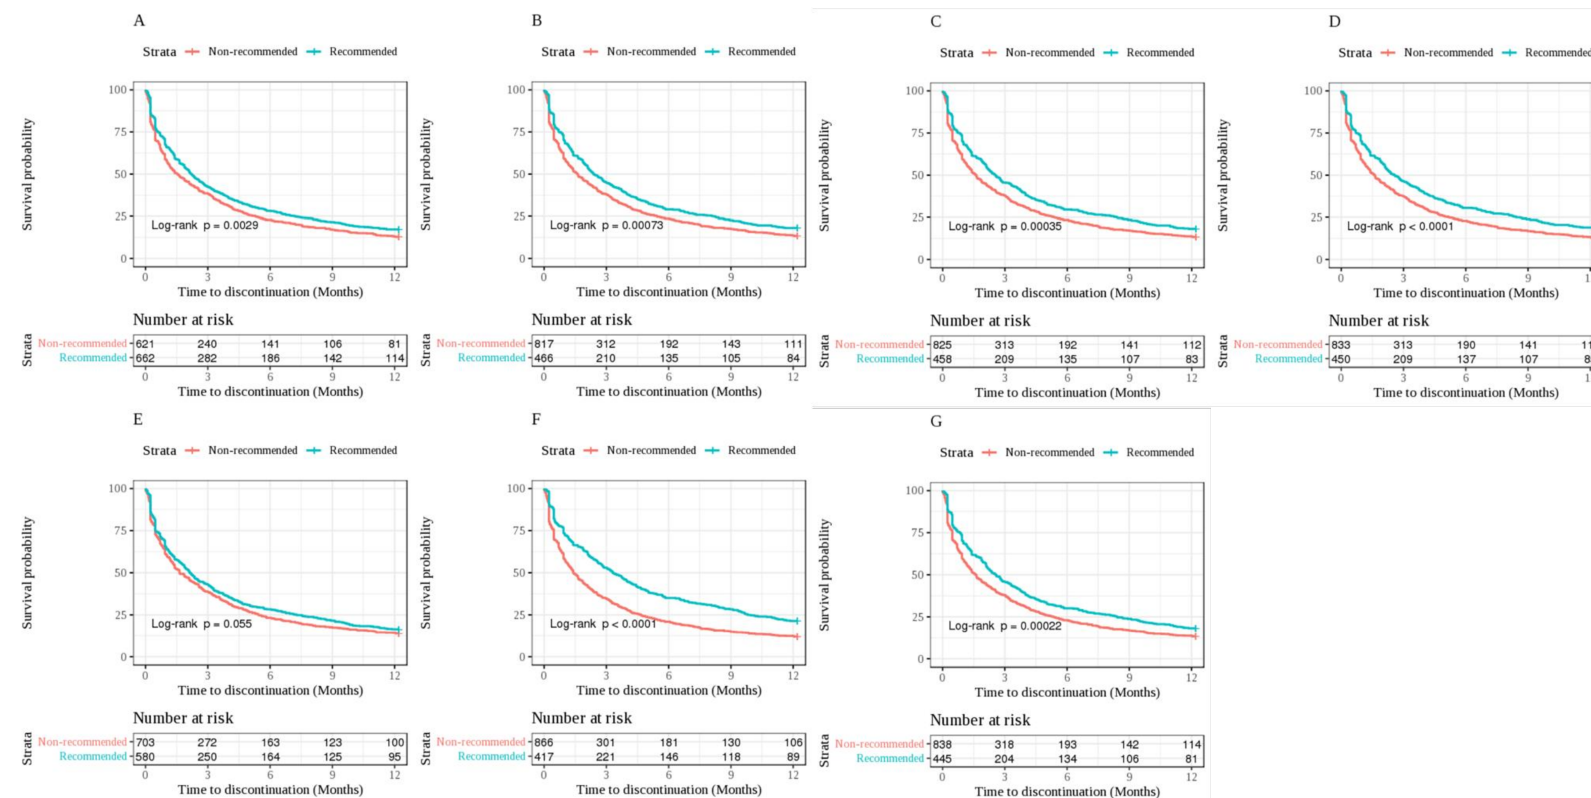

LR, logistic regression; LASSO, least absolute shrinkage and selection operator; GBM, gradient boosting machine (A) backward stepwise LR, (B) LASSO, (C) ridge, (D) elastic net, (E) random forest, (F) GBM, and (G) SuperLearner

Figure S6. (Continued)

(b) Aripiprazole

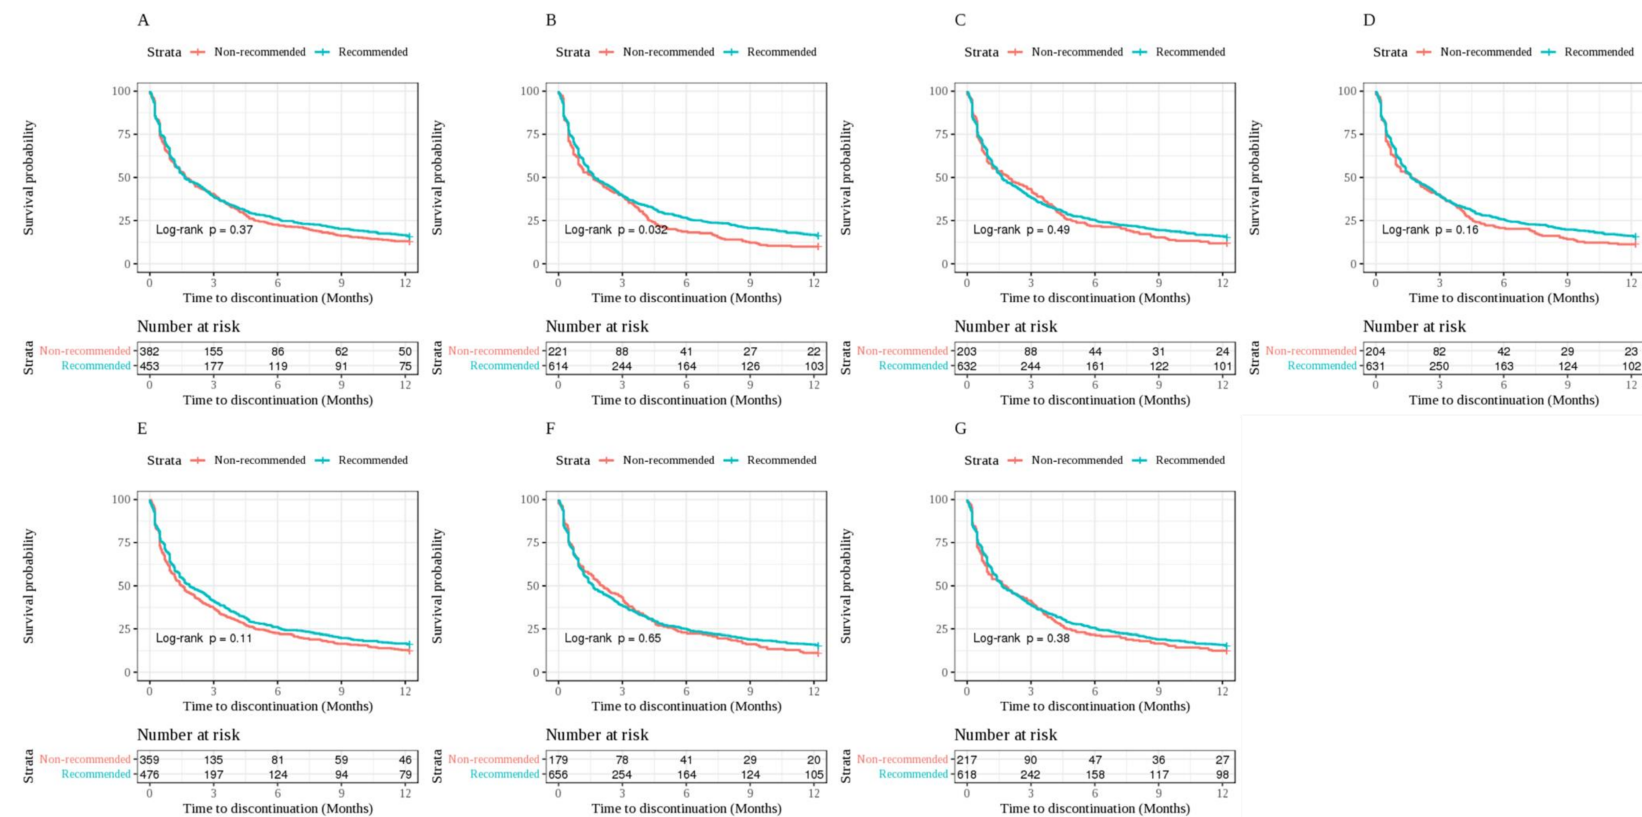

LR, logistic regression; LASSO, least absolute shrinkage and selection operator; GBM, gradient boosting machine (A) backward stepwise LR, (B) LASSO, (C) ridge, (D) elastic net, (E) random forest, (F) GBM, and (G) SuperLearner

**Table S6. Relative predictor importance of the different prediction models for treatment continuation of risperidone**

|                                                                                                    | Backward<br>Stepwise<br>LR | LASSO | Ridge | Elastic<br>net | Random<br>forest | GBM   |
|----------------------------------------------------------------------------------------------------|----------------------------|-------|-------|----------------|------------------|-------|
| <b>Demographics</b>                                                                                |                            |       |       |                |                  |       |
| Female sex <sup>a</sup>                                                                            | 0.032                      | 0.120 | 0.115 | 0.108          | 0.176            | 0.082 |
| Age (years) <sup>a</sup>                                                                           | 0.160                      | 0.749 | 0.573 | 0.634          | 1.000            | 1.000 |
| Insurance type: medical aid                                                                        | 0.045                      | 0.182 | 0.172 | 0.161          | 0.166            | 0.130 |
| <b>Comorbidities of mental health disorders <sup>a</sup></b>                                       |                            |       |       |                |                  |       |
| First diagnosis of schizophrenia at index date                                                     | 0.018                      | 0.055 | 0.082 | 0.054          | 0.184            | 0.071 |
| Anxiety disorder                                                                                   | 0.028                      | 0.080 | 0.102 | 0.078          | 0.107            | 0.044 |
| Depression                                                                                         |                            |       | 0.053 | 0.005          | 0.141            | 0.060 |
| ADHD                                                                                               | 0.016                      | 0.059 | 0.104 | 0.052          | 0.134            | 0.081 |
| Somatoform disorder                                                                                |                            | 0.054 | 0.162 | 0.078          | 0.019            | 0.005 |
| Reaction to severe stress, and adjustment disorder                                                 | 0.039                      | 0.117 | 0.136 | 0.110          | 0.076            | 0.025 |
| Other neurotic disorders                                                                           |                            |       | 0.105 |                | 0.013            | 0.001 |
| Mental retardation                                                                                 | 0.034                      | 0.140 | 0.165 | 0.122          | 0.151            | 0.167 |
| Other behavior and emotional disorders with onset generally occurring in childhood and adolescence | 0.062                      | 0.223 | 0.271 | 0.206          | 0.083            | 0.094 |
| Emotional disorders with onset specific to childhood                                               |                            |       | 0.071 | 0.010          | 0.099            | 0.086 |
| Nonorganic disorder                                                                                |                            |       | 0.095 |                | 0.023            | 0.005 |
| Tic disorder                                                                                       | 0.041                      | 0.065 | 0.074 | 0.076          | 0.076            | 0.061 |
| Bipolar disorder                                                                                   | 0.050                      | 0.048 | 0.113 | 0.064          | 0.038            | 0.017 |
| Autism spectrum disorder                                                                           | 0.046                      | 0.207 | 0.275 | 0.186          | 0.150            | 0.211 |
| Other mental health disorders                                                                      |                            |       | 0.037 |                | 0.163            | 0.059 |

LR, logistic regression; LASSO, least absolute shrinkage and selection operator; GBM, Gradient boosting machine; ADHD, attention deficit hyperactivity disorder; SSRI, selective serotonin reuptake inhibitor; SNRI, selective norepinephrine reuptake inhibitor; MAO inhibitor, monoamine oxidase inhibitor; MHD, mental health disorders

*Continued on the next page*

**Table S6. (Continued)**

|                                                                  | Stepwise LR | LASSO | Ridge | Elastic net | Random forest | GBM   |
|------------------------------------------------------------------|-------------|-------|-------|-------------|---------------|-------|
| <b>Prescriptions of other psychotropics <sup>a</sup></b>         |             |       |       |             |               |       |
| Anticholinergic drugs                                            | 0.091       | 0.240 | 0.367 | 0.231       | 0.029         | 0.043 |
| Antianxiety drugs                                                | 0.022       | 0.073 | 0.072 | 0.065       | 0.161         | 0.076 |
| SSRI/SNRI                                                        |             |       | 0.027 |             | 0.140         | 0.032 |
| Tricyclic antidepressants                                        |             |       | 0.041 |             | 0.027         | 0.013 |
| MAO inhibitor                                                    |             |       | 0.064 |             | 0.045         | 0.011 |
| Methylphenidate                                                  |             | 0.023 | 0.099 | 0.025       | 0.121         | 0.087 |
| Nonstimulants for ADHD                                           | 0.036       | 0.081 | 0.139 | 0.086       | 0.073         | 0.093 |
| Antiepileptic drugs                                              | 0.035       | 0.061 | 0.083 | 0.060       | 0.118         | 0.072 |
| Lithium                                                          |             | 0.002 | 0.145 | 0.032       | 0.013         | 0.002 |
| <b>Comorbidities of general clinical conditions <sup>a</sup></b> |             |       |       |             |               |       |
| Neurologic and neuromuscular                                     |             | 0.086 | 0.177 | 0.092       | 0.064         | 0.069 |
| Cardiovascular                                                   |             |       | 0.017 |             | 0.031         | 0.018 |
| Renal and urologic                                               |             |       | 0.021 |             | 0.038         | 0.043 |
| Gastrointestinal                                                 |             |       | 0.093 |             | 0.025         | 0.003 |
| Hematologic or immunologic                                       |             |       | 0.010 |             | 0.005         | 0.000 |
| Metabolic                                                        | 0.040       | 0.099 | 0.132 | 0.101       | 0.076         | 0.048 |
| Other congenital or genetic defects                              |             | 0.024 | 0.087 | 0.042       | 0.065         | 0.037 |
| Asthma                                                           |             |       | 0.028 |             | 0.146         | 0.071 |
| Diabetes Mellitus                                                |             |       | 0.000 |             | 0.018         | 0.008 |
| Seizure                                                          |             | 0.078 | 0.117 | 0.074       | 0.106         | 0.102 |
| <b>Prescriptions of other general medications <sup>a</sup></b>   |             |       |       |             |               |       |
| Antipyretics, analgesics                                         | 0.016       | 0.037 | 0.063 | 0.038       | 0.198         | 0.099 |
| Antihistamines                                                   | 0.017       | 0.021 | 0.058 | 0.030       | 0.159         | 0.038 |
| Cardiovascular system drugs                                      |             |       | 0.004 |             | 0.084         | 0.026 |
| Respiratory system drug                                          |             |       | 0.010 |             | 0.162         | 0.070 |
| Antibiotic preparations                                          |             |       | 0.041 | 0.005       | 0.155         | 0.056 |
| Narcotic analgesics                                              |             |       | 0.100 |             | 0.021         | 0.001 |
| <b>Utilization of health care system <sup>a</sup></b>            |             |       |       |             |               |       |
| No. any route visits, MHD                                        |             |       | 0.009 |             | 0.418         | 0.193 |
| No. inpatient visits, MHD                                        | 0.831       | 1.000 | 0.973 | 1.000       | 0.021         | 0.009 |
| No. outpatient visits, MHD                                       |             |       | 0.023 |             | 0.421         | 0.182 |
| No. EM visits, MHDs                                              |             | 0.446 | 1.000 | 0.559       | 0.004         | 0.000 |
| No. any route visits, non-MHD                                    | 0.920       |       | 0.022 |             | 0.842         | 0.486 |
| No. inpatient visits, non-MHD                                    |             |       | 0.228 |             | 0.155         | 0.080 |
| No. outpatient visits, non-MHD                                   | 1.000       | 0.005 | 0.009 | 0.053       | 0.842         | 0.377 |
| No. EM visits, non-MHDs                                          | 0.284       | 0.599 | 0.632 | 0.594       | 0.043         | 0.015 |

LR, logistic regression; LASSO, least absolute shrinkage and selection operator; GBM, Gradient boosting machine; ADHD, attention deficit hyperactivity disorder; SSRI, selective serotonin reuptake inhibitor; SNRI, selective norepinephrine reuptake inhibitor; MAO inhibitor, monoamine oxidase inhibitor; MHD, mental health disorders

**Table S7. Relative predictor importance of the different prediction models for treatment continuation of aripiprazole**

|                                                                                                    | Backward<br>Stepwise<br>LR | LASSO | Ridge | Elastic<br>net | Random<br>forest | GBM   |
|----------------------------------------------------------------------------------------------------|----------------------------|-------|-------|----------------|------------------|-------|
| <b>Demographics</b>                                                                                |                            |       |       |                |                  |       |
| Female sex <sup>a</sup>                                                                            | 0.005                      | 0.187 | 0.174 | 0.189          | 0.184            | 0.099 |
| Age (years) <sup>a</sup>                                                                           | 0.024                      | 1.000 | 0.694 | 1.000          | 1.000            | 1.000 |
| Insurance type: medical aid                                                                        | 0.006                      | 0.082 | 0.108 | 0.078          | 0.085            | 0.034 |
| <b>Comorbidities of mental health disorders <sup>a</sup></b>                                       |                            |       |       |                |                  |       |
| First diagnosis of schizophrenia at index date                                                     |                            | 0.000 | 0.011 | 0.000          | 0.220            | 0.102 |
| Anxiety disorder                                                                                   | 0.004                      | 0.063 | 0.093 | 0.065          | 0.133            | 0.057 |
| Depression                                                                                         | 0.003                      | 0.085 | 0.107 | 0.091          | 0.142            | 0.054 |
| ADHD                                                                                               | 0.005                      | 0.129 | 0.186 | 0.138          | 0.159            | 0.119 |
| Somatoform disorder                                                                                |                            |       | 0.011 |                | 0.053            | 0.022 |
| Reaction to severe stress, and adjustment disorder                                                 |                            |       | 0.094 |                | 0.077            | 0.014 |
| Other neurotic disorders                                                                           |                            |       | 0.135 |                | 0.010            |       |
| Mental retardation                                                                                 |                            |       | 0.012 |                | 0.098            | 0.057 |
| Other behavior and emotional disorders with onset generally occurring in childhood and adolescence |                            |       | 0.070 |                | 0.039            | 0.025 |
| Emotional disorders with onset specific to childhood                                               | 0.008                      | 0.085 | 0.134 | 0.081          | 0.056            | 0.034 |
| Nonorganic disorder                                                                                | 0.010                      | 0.086 | 0.185 | 0.090          | 0.026            | 0.004 |
| Tic disorder                                                                                       | 0.008                      | 0.300 | 0.352 | 0.313          | 0.154            | 0.181 |
| Bipolar disorder                                                                                   |                            |       | 0.040 |                | 0.056            | 0.040 |
| Autism spectrum disorder                                                                           |                            | 0.071 | 0.215 | 0.081          | 0.108            | 0.123 |
| Other mental health disorders                                                                      |                            |       | 0.054 |                | 0.175            | 0.097 |

LR, logistic regression; LASSO, least absolute shrinkage and selection operator; GBM, Gradient boosting machine; ADHD, attention deficit hyperactivity disorder; SSRI, selective serotonin reuptake inhibitor; SNRI, selective norepinephrine reuptake inhibitor; MAO inhibitor, monoamine oxidase inhibitor; MHD, mental health disorders  
Continued on the next page

**Table S7. (Continued)**

|                                                                  | Stepwise LR | LASSO | Ridge | Elastic net | Random forest | GBM   |
|------------------------------------------------------------------|-------------|-------|-------|-------------|---------------|-------|
| <b>Prescriptions of other psychotropics <sup>a</sup></b>         |             |       |       |             |               |       |
| Anticholinergic drugs                                            |             | 0.156 | 0.395 | 0.159       | 0.029         | 0.001 |
| Antianxiety drugs                                                |             | 0.065 | 0.078 | 0.065       | 0.171         | 0.072 |
| SSRI/SNRI                                                        |             | 0.000 | 0.080 |             | 0.130         | 0.068 |
| TCA                                                              |             | 0.000 | 0.114 |             | 0.027         | 0.004 |
| MAO inhibitor                                                    | 0.009       | 0.142 | 0.192 | 0.143       | 0.037         | 0.015 |
| Methylphenidate                                                  |             | 0.000 | 0.058 |             | 0.101         | 0.098 |
| Nonstimulants for ADHD                                           |             | 0.000 | 0.142 |             | 0.075         | 0.070 |
| Antiepileptic drugs                                              | 0.005       | 0.099 | 0.113 | 0.096       | 0.111         | 0.068 |
| Lithium                                                          | 0.018       | 0.549 | 0.475 | 0.547       | 0.050         | 0.154 |
| <b>Comorbidities of general clinical conditions <sup>a</sup></b> |             |       |       |             |               |       |
| Neurologic and neuromuscular                                     |             |       | 0.046 |             | 0.035         | 0.030 |
| Cardiovascular                                                   |             |       | 0.172 |             | 0.018         |       |
| Renal and urologic                                               |             |       | 0.069 |             | 0.016         | 0.003 |
| Gastrointestinal                                                 |             |       | 0.160 |             | 0.019         | 0.001 |
| Hematologic or immunologic                                       |             |       | 0.056 |             | 0.013         |       |
| Metabolic                                                        |             | 0.020 | 0.127 | 0.026       | 0.048         | 0.013 |
| Other congenital or genetic defects                              |             |       | 0.111 |             | 0.047         | 0.032 |
| Asthma                                                           | 0.003       | 0.069 | 0.148 | 0.076       | 0.172         | 0.135 |
| Diabetes mellitus                                                |             |       | 0.203 |             | 0.008         | 0.000 |
| Seizure                                                          | 0.005       | 0.115 | 0.175 | 0.120       | 0.103         | 0.104 |
| <b>Prescriptions of other general medications <sup>a</sup></b>   |             |       |       |             |               |       |
| Antipyretics, analgesics                                         | 0.003       | 0.047 | 0.083 | 0.047       | 0.199         | 0.086 |
| Antihistamines                                                   |             |       | 0.004 |             | 0.176         | 0.076 |
| Cardiovascular system drugs                                      |             | 0.043 | 0.119 | 0.048       | 0.071         | 0.015 |
| Respiratory system drug                                          |             |       | 0.069 |             | 0.158         | 0.060 |
| Antibiotic preparations                                          |             |       | 0.022 |             | 0.171         | 0.077 |
| Narcotic analgesics                                              |             |       | 0.011 |             | 0.022         | 0.015 |
| <b>Utilization of health care system <sup>a</sup></b>            |             |       |       |             |               |       |
| No. any route visits, MHD                                        |             | 0.184 | 0.143 | 0.174       | 0.440         | 0.229 |
| No. inpatient visits, MHD                                        |             |       | 0.183 |             | 0.031         | 0.005 |
| No. outpatient visits, MHD                                       | 0.005       |       | 0.056 |             | 0.425         | 0.164 |
| No. EM visits, MHDs                                              | 0.734       | 0.611 | 1.000 | 0.594       | 0.003         | 0.001 |
| No. any route visits, non-MHD                                    | 1.000       |       | 0.104 |             | 0.839         | 0.522 |
| No. inpatient visits, non-MHD                                    | 0.161       | 0.701 | 0.753 | 0.668       | 0.130         | 0.049 |
| No. outpatient visits, non-MHD                                   | 1.047       |       | 0.114 |             | 0.852         | 0.464 |
| No. EM visits, non-MHDs                                          |             | 0.338 | 0.742 | 0.354       | 0.043         | 0.019 |

LR, logistic regression; LASSO, least absolute shrinkage and selection operator; GBM, Gradient boosting machine; ADHD, attention deficit hyperactivity disorder; SSRI, selective serotonin reuptake inhibitor; SNRI, selective norepinephrine reuptake inhibitor; MAO inhibitor, monoamine oxidase inhibitor; MHD, mental health disorders

**Table S8. Performance of machine-learning models in predicting treatment continuation in the test dataset (using age and utilization of health care system as categorical predictors)**

| Model                | Risperidone |                     | Aripiprazole |                     |
|----------------------|-------------|---------------------|--------------|---------------------|
|                      | BS          | AUROC (95% CI)      | BS           | AUROC (95% CI)      |
| Backward stepwise LR | 0.122       | 0.675 (0.634–0.717) | 0.116        | 0.675 (0.620–0.731) |
| LASSO                | 0.121       | 0.685 (0.644–0.725) | 0.115        | 0.688 (0.633–0.743) |
| Ridge                | 0.122       | 0.686 (0.645–0.727) | 0.115        | 0.687 (0.632–0.743) |
| e-net                | 0.122       | 0.686 (0.645–0.727) | 0.115        | 0.687 (0.632–0.742) |
| Random forest        | 0.139       | 0.627 (0.583–0.671) | 0.133        | 0.639 (0.583–0.696) |
| GBM                  | 0.127       | 0.670 (0.629–0.711) | 0.123        | 0.675 (0.618–0.732) |
| SuperLearner         | 0.121       | 0.686 (0.645–0.727) | 0.115        | 0.687 (0.632–0.743) |

BS, brier score; AUROC, area under the receiver operating characteristic curve; CI, confidence intervals; LR, logistic regression; LASSO, least absolute shrinkage and selection operator; e-net, elastic net; GBM, gradient boosting machine

## Reference

1. Zou H, Hastie TJ, Tibshirani R. Regularization and variable selection via the elastic net. *Biometrika* 2005;67(2):301-20.
2. Breiman L. Random Forests. *Machine Learning* 2001;45(1):5-32. doi: 10.1023/A:1010933404324
3. Trevor Hastie RT, Jerome Friedman. Boosting and additive trees. In: *The Elements of Statistical Learning*. 2 ed: Springer, New York, NY 2009.
4. van der Laan MJ, Polley EC, Hubbard AE. Super Learner. *Statistical Applications in Genetics and Molecular Biology* 2007;6(1) doi: doi:10.2202/1544-6115.1309
5. Kennedy C. Guide to SuperLearner 2017 [Available from: <https://cran.r-project.org/web/packages/SuperLearner/vignettes/Guide-to-SuperLearner.html>] accessed August 12 2021.
6. Friedman J, Hastie T, Tibshirani R. Glmnet: Lasso and elastic-net regularized generalized linear models. *R Package Version* 2009;1
7. Generalized Boosted Models: A guide to the gbm package; 2006.
8. Steyerberg EW, Vickers AJ, Cook NR, et al. Assessing the performance of prediction models: a framework for traditional and novel measures. *Epidemiology* 2010;21(1):128-38. doi: 10.1097/EDE.0b013e3181c30fb2 [published Online First: 2009/12/17]
